# Supplementary material
Source: publisher figshare collection journal article supplement (https://frontiersin.figshare.com/ndownloader/files/15047222)
Supplement: Supplementary file [file 15047222]

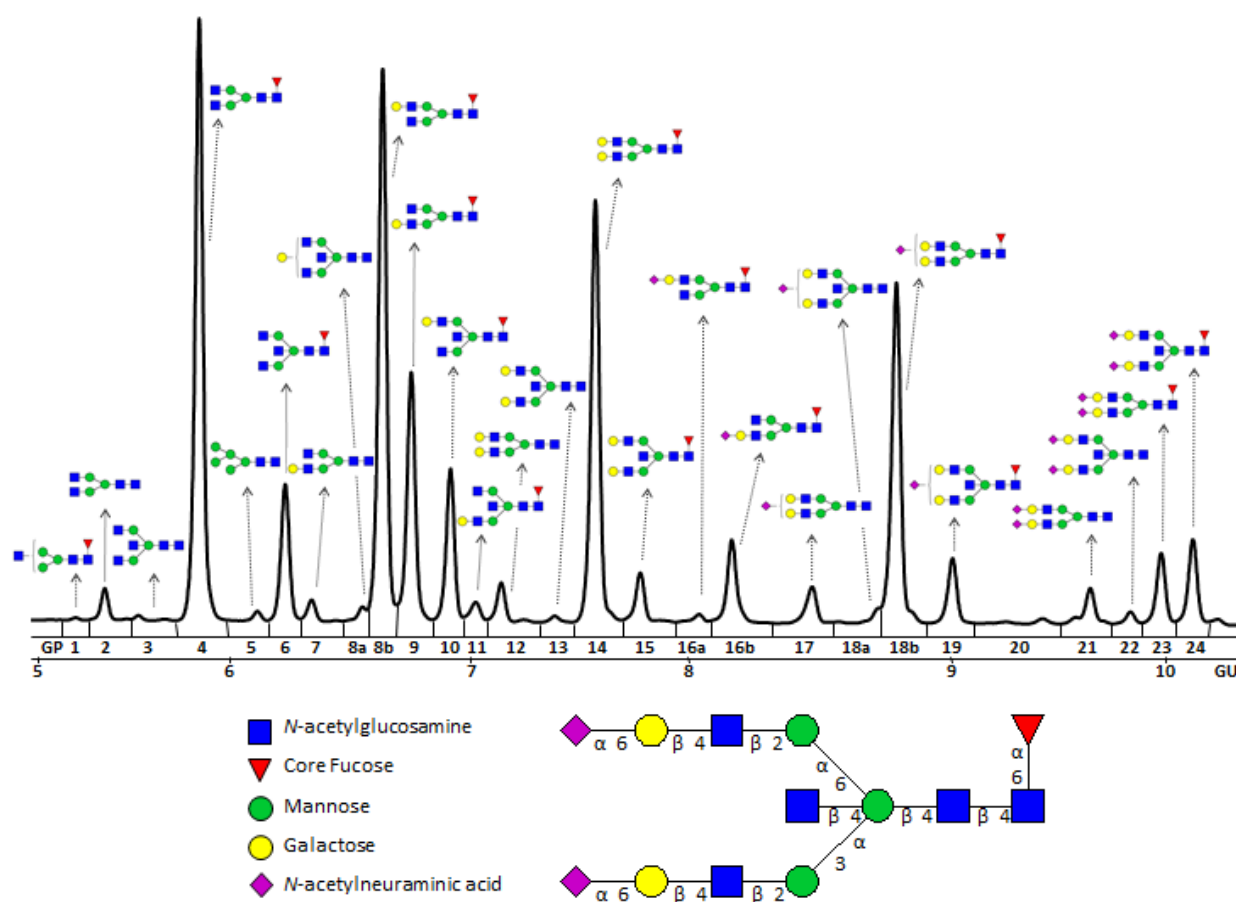

**Supplementary figure 1. Representative chromatogram of 2-AB labeled N-linked glycans released from IgGs isolated from human plasma and separated by HILIC-UPLC.** The integration areas, together with a major structure presented in each glycan peak are given. Glycan peaks are numbered from GP1-GP24, as used in the paper.
